# Supplementary material
Source: MDPI journal article supplement (https://www.mdpi.com/2073-4433/7/12/153)
Supplement: s1 [file s1]

# Supplementary Materials: Seasonal Variations and Sources of 17 Aerosol Metal Elements in Suburban Nanjing, China. *Atmosphere*, 2016, 7, 153.

Lu Qi, Mindong Chen, Xinlei Ge, Yafei Zhang and Bingfang Guo

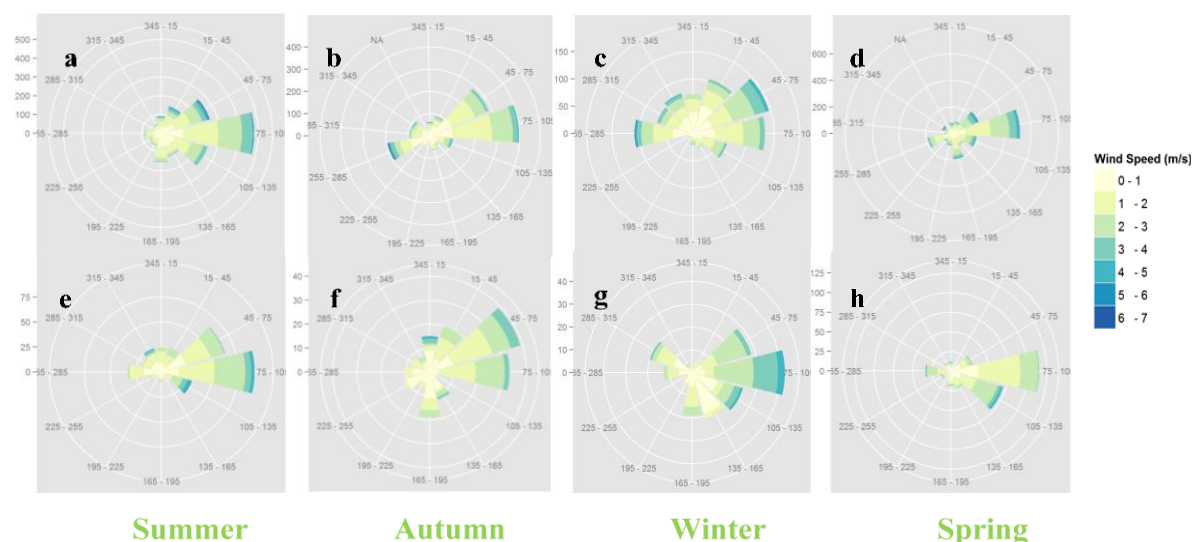

**Figure S1.** The comparison of wind direction and wind speed between four seasons and collecting days. (a–d) shows the WD and WS in different seasons (data of per hour); (e–h) shows the WD and WS in the collecting days.

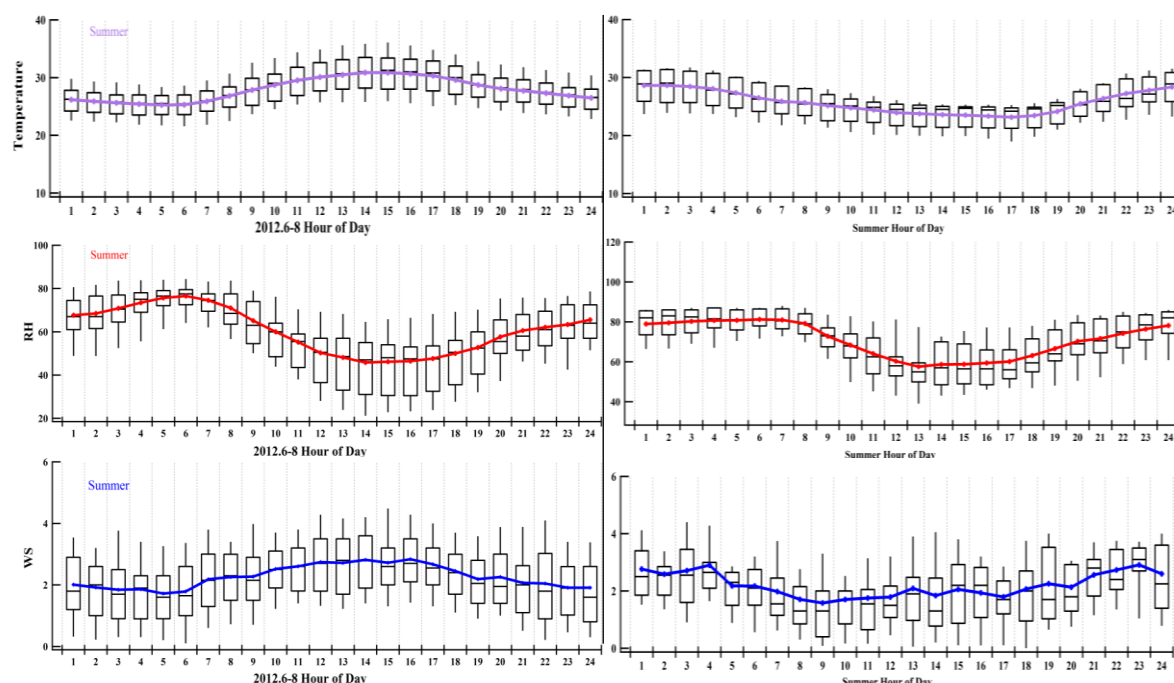

**Figure S2.** The comparison of diurnal variation of Temperature, Relative humidity, Wind speed between whole the summer (data of per hour) and collection days in summer.

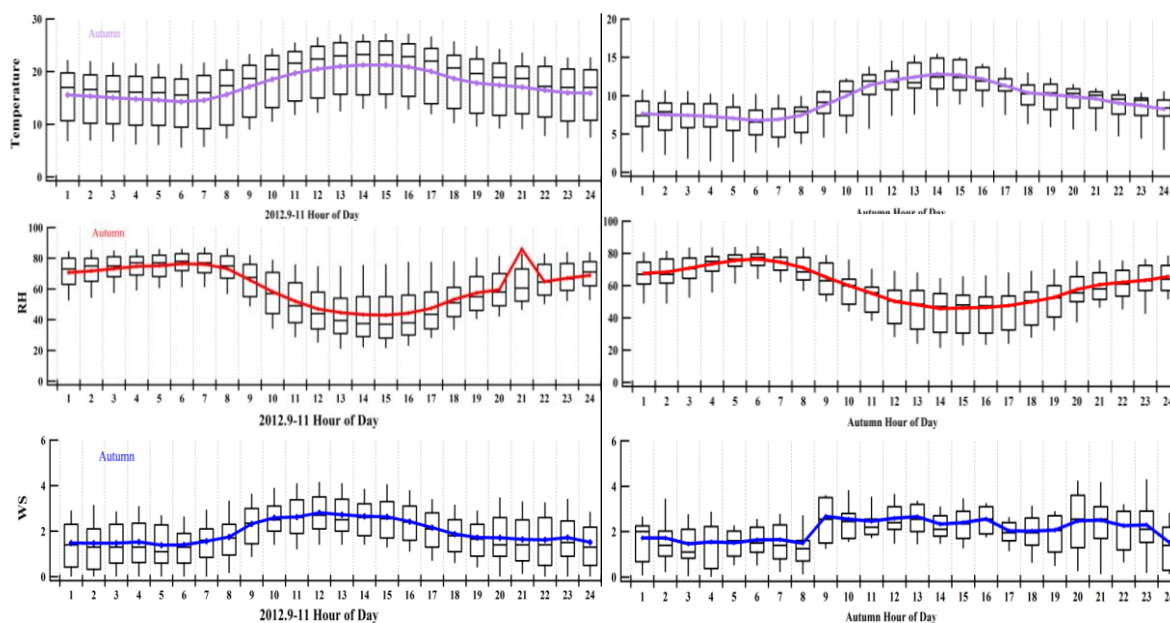

**Figure S3.** The comparison of diurnal variation of Temperature, Relative humidity, Wind speed between whole the autumn (data of per hour) and collection days in autumn.

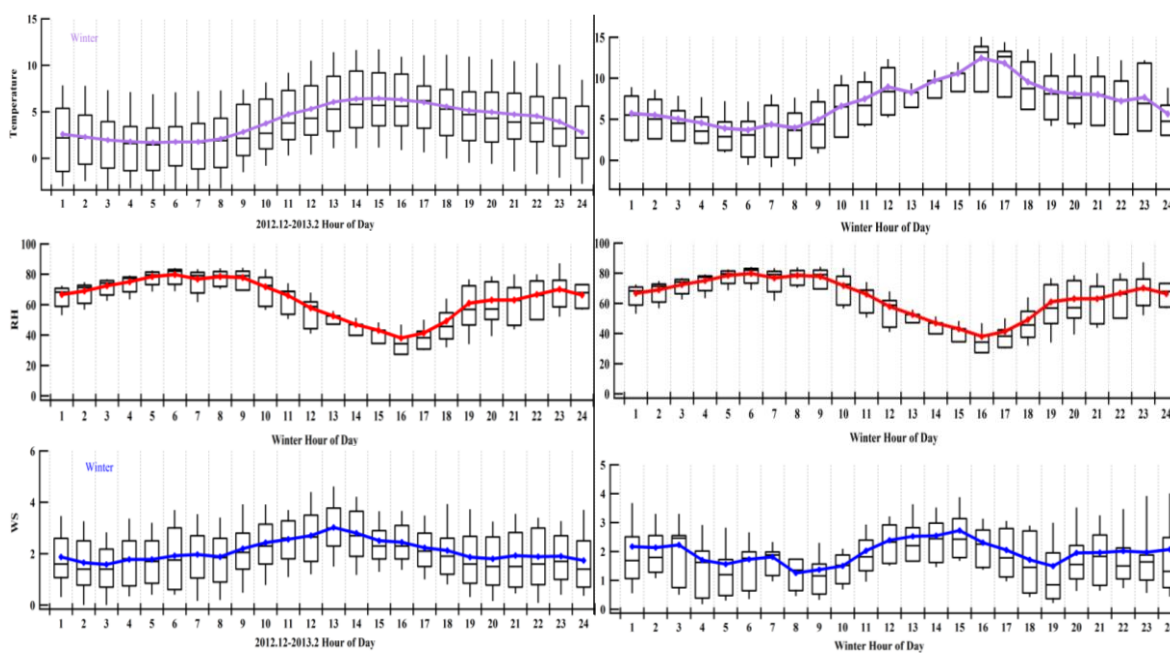

**Figure S4.** The comparison of diurnal variation of Temperature, Relative humidity, Wind speed between whole the winter (data of per hour) and collection days in winter.

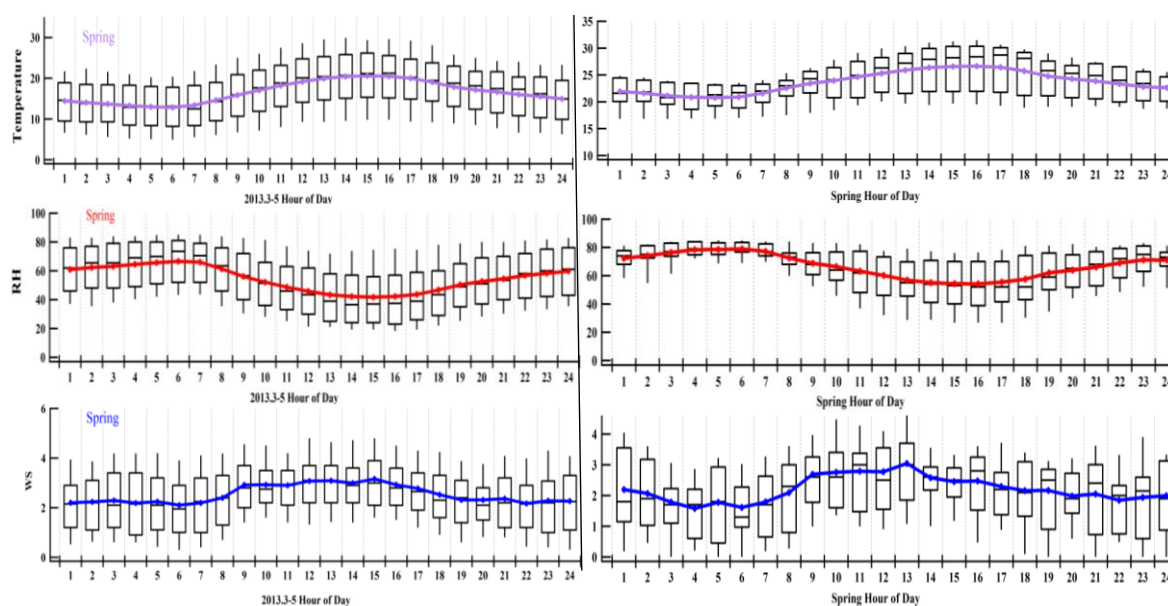

**Figure S5.** The comparison of diurnal variation of Temperature, Relative humidity, Wind speed between whole the spring (data of per hour) and collection days in spring.

**Table S1.** The date of sixty-four samples.

| Summer                            | Autumn                             | Winter                            | Spring                        |
|-----------------------------------|------------------------------------|-----------------------------------|-------------------------------|
| 23 August 2012 20:00–8:00         | 17 and 18 November 2012 20:00–8:00 | 25 and 26 January 2013 20:00–8:00 | 20 and 21 May 2013 20:00–8:00 |
| 24 August 2012 8:00–20:00         | 18 November 2012 8:00–20:00        | 26 January 2013 8:00–20:00        | 21 May 2013 8:00–20:00        |
| 24 and 25 August 2012 20:00–8:00  | 18 and 19 November 2012 20:00–8:00 | 26 and 27 January 2013 20:00–8:00 | 22 May 2013 8:00–20:00        |
| 25 August 2012 8:00–20:00         | 19 November 2012 8:00–20:00        | 27 January 2013 8:00–20:00        | 22 and 23 May 2013 20:00–8:00 |
| 26 August 2012 8:00–20:00         | 19 and 20 November 2012 20:00–8:00 | 27 and 28 January 2013 20:00–8:00 | 23 May 2013 8:00–20:00        |
| 26 and 27 August 2012 20:00–8:00  | 20 November 2012 8:00–20:00        | 28 January 2013 8:00–20:00        | 23 and 24 May 2013 20:00–8:00 |
| 29 August 2012 8:00–20:00         | 20 and 21 November 2012 20:00–8:00 | 28 and 29 January 2012 20:00–8:00 | 24 May 2013 8:00–20:00        |
| 29 and 30 August 2012 20:00–8:00  | 24 November 2012 8:00–20:00        | 29 January 2013 8:00–20:00        | 24 and 25 May 2013 20:00–8:00 |
| 30 August 2012 8:00–20:00         | 25 November 2012 8:00–20:00        | 29 and 30 January 2013 20:00–8:00 | 25 May 2013 8:00–20:00        |
| 30 and 31 August 2012 20:00–8:00  | 26 November 2012 8:00–20:00        | 30 January 2013 8:00–20:00        | 28 May 2013 8:00–20:00        |
| 31 August 2012 8:00–20:00         | 26 and 27 November 2012 20:00–8:00 | -                                 | 28 and 29 May 2013 20:00–8:00 |
| 1 September 2012 8:00–20:00       | 27 November 2012 8:00–20:00        | -                                 | 29 May 2013 8:00–20:00        |
| 1 and 2 September 2012 20:00–8:00 | 27 and 28 November 2012 20:00–8:00 | -                                 | 2 June 2013 8:00–20:00        |
| 2 September 2012 8:00–20:00       | 28 November 2012 8:00–20:00        | -                                 | 2 and 3 June 2013 20:00–8:00  |
| 4 September 2012 8:00–20:00       | -                                  | -                                 | 3 and 4 June 2013 20:00–8:00  |
| 4 and 5 September 2012 20:00–8:00 | -                                  | -                                 | 4 June 2013 8:00–20:00        |
| 5 September 2012 8:00–20:00       | -                                  | -                                 | 4 and 5 June 2013 20:00–8:00  |
| 5 and 6 September 2012 20:00–8:00 | -                                  | -                                 | 5 June 2013 8:00–20:00        |
| 6 September 2012 8:00–20:00       | -                                  | -                                 | 5 and 6 June 2013 20:00–8:00  |
| 8 September 2012 8:00–20:00       | -                                  | -                                 | 6 June 2013 8:00–20:00        |

**Table S2.** The recovery of the two certified materials of soil (GBW07403) and fly ash (GBW08401) ( $n = 10$ ).

| Element | Recovery (%) of GBW07403 | Recovery (%) of GBW08401 |
|---------|--------------------------|--------------------------|
| Na      | 104.3 ± 2.2              | 103.2 ± 4.5              |
| Mg      | 95.6 ± 4.5               | 101.1 ± 3.1              |
| Al      | 96.3 ± 2.1               | 96.4 ± 6.2               |
| V       | 99.8 ± 5.1               | 99.7 ± 2.3               |
| Cr      | 101.2 ± 3.6              | 104.2 ± 3.6              |
| Mn      | 95.6 ± 2.2               | 95.9 ± 2.5               |

Table S2. *Cont.*

| Element | Recovery (%) of GBW07403 | Recovery (%) of GBW08401 |
|---------|--------------------------|--------------------------|
| Ni      | 102.5 ± 5.3              | 105.3 ± 4.9              |
| Cu      | 93.2 ± 2.9               | 96.8 ± 4.1               |
| Zn      | 97.1 ± 4.3               | 97.3 ± 3.5               |
| As      | 99.3 ± 3.8               | 95.4 ± 4.7               |
| Se      | 100.9 ± 6.2              | 99.2 ± 2.2               |
| Sr      | 96.3 ± 2.13              | 97.6 ± 3.5               |
| Cd      | 99.1 ± 5.1               | 98.7 ± 5.5               |
| Ba      | 102.7 ± 5.6              | 93.9 ± 4.3               |
| Pb      | 101.2 ± 6.6              | 99.4 ± 2.9               |
| Mo      | 98.6 ± 4.8               | 99.9 ± 3.8               |
| Sb      | 96.4 ± 4.2               | 102.3 ± 1.4              |

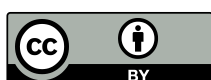

© 2016 by the authors; licensee MDPI, Basel, Switzerland. This article is an open access article distributed under the terms and conditions of the Creative Commons by Attribution (CC-BY) license (<http://creativecommons.org/licenses/by/4.0/>).
